# Supplementary material for: Locally Performed HRD Testing for Ovarian Cancer? Yes, We Can!
Source: MDPI journal article supplement (doi:10.3390/cancers15010043), 2022-12-21
Supplement: s1 [file s1]

**Table S1.** Sample sequencing metrics of AmoyDx HRD Focus Panel

| Pt    | Total Reads | Q20    | Q30    | Alignment | Clean Match | Coverage | BRCA EffectiveDepth | BRCA Uniformity | BRCA CV | SNP EffectiveDepth | SNP Uniformity | SNP CV | GIS  |
|-------|-------------|--------|--------|-----------|-------------|----------|---------------------|-----------------|---------|--------------------|----------------|--------|------|
| ID_01 | 23,799,410  | 98.61% | 97.88% | 98.96%    | 98.11%      | 99.92%   | 1107                | 100.00%         | 0.32    | 278                | 96.71%         | 0.62   | 99.2 |
| ID_02 | 26,361,786  | 98.56% | 97.81% | 99.06%    | 98.17%      | 99.94%   | 1898                | 99.61%          | 0.33    | 342                | 95.89%         | 0.60   | 100  |
| ID_03 | 32,662,858  | 97.81% | 96.62% | 98.94%    | 98.18%      | 99.93%   | 3010                | 100.00%         | 0.32    | 446                | 95.65%         | 0.69   | 45.4 |
| ID_04 | 26,723,692  | 98.63% | 97.89% | 99.22%    | 98.27%      | 99.94%   | 1247                | 99.61%          | 0.40    | 366                | 96.36%         | 0.70   | 98.3 |
| ID_05 | 27,304,074  | 98.53% | 97.75% | 99.02%    | 98.05%      | 99.92%   | 2729                | 100.00%         | 0.25    | 351                | 95.93%         | 0.56   | 98.3 |
| ID_06 | 29,114,910  | 98.05% | 96.97% | 99.11%    | 98.20%      | 99.92%   | 3393                | 100.00%         | 0.27    | 453                | 96.95%         | 0.61   | 97.3 |
| ID_07 | 26,925,444  | 98.52% | 97.74% | 99.07%    | 98.19%      | 99.94%   | 3942                | 99.61%          | 0.29    | 411                | 96.10%         | 0.60   | 36.1 |
| ID_08 | 26,871,078  | 98.57% | 97.83% | 99.06%    | 98.12%      | 99.94%   | 1670                | 99.61%          | 0.27    | 319                | 95.36%         | 0.65   | 97.1 |
| ID_09 | 33,853,096  | 97.98% | 96.87% | 99.07%    | 98.23%      | 99.92%   | 2439                | 99.61%          | 0.25    | 540                | 96.68%         | 0.66   | 97.6 |
| ID_10 | 34,407,574  | 97.80% | 96.60% | 98.58%    | 97.58%      | 99.92%   | 2454                | 99.61%          | 0.33    | 324                | 95.73%         | 0.60   | 96.8 |
| ID_11 | 30,663,268  | 97.93% | 96.78% | 98.95%    | 98.13%      | 99.92%   | 3177                | 100.00%         | 0.28    | 415                | 95.12%         | 0.62   | 100  |
| ID_12 | 25,169,280  | 98.54% | 97.78% | 99.15%    | 98.30%      | 99.92%   | 1726                | 99.61%          | 0.34    | 325                | 97.25%         | 0.56   | 59.1 |
| ID_13 | 27,032,192  | 98.49% | 97.69% | 99.27%    | 98.30%      | 99.95%   | 2034                | 100.00%         | 0.27    | 466                | 96.93%         | 0.66   | 14.1 |
| ID_14 | 31,517,690  | 97.84% | 96.67% | 98.83%    | 97.84%      | 99.93%   | 2658                | 100.00%         | 0.28    | 368                | 97.02%         | 0.56   | 98.9 |
| ID_15 | 31,566,644  | 97.90% | 96.75% | 98.85%    | 98.06%      | 99.92%   | 2104                | 100.00%         | 0.29    | 313                | 96.71%         | 0.60   | 72   |
| ID_16 | 38,562,918  | 97.80% | 96.61% | 98.93%    | 98.10%      | 99.93%   | 3679                | 100.00%         | 0.21    | 593                | 96.50%         | 0.72   | 84   |

Optimum parameters as indicated by Amoy protocol: Q20 ≥ 85%; Q30 ≥ 75%; Alignment ≥ 85%; Clean Match ≥ 85%; Coverage ≥ 98%; BRCA Effective Depth ≥ 400x; BRCA Uniformity ≥ 95%; BRCA CV: the smaller the better; SNP Effective Depth ≥ 200x; SNP Uniformity ≥ 90%; SNP CV: the smaller the better
